## Calcium Concentration-dependent Mechanisms through which Ketamine Relaxes Canine Airway Smooth Muscle

Christina M. Pabelick, M.D.,\* Keith A. Jones, M.D.,† Kathleen Street,‡ Robert R. Lorenz,§ David O. Warner, M.D.||

**Background:** Ketamine is a potent bronchodilator that, in clinically used concentrations, relaxes airway smooth muscle in part by a direct effect. This study explored the role of calcium concentration ( $[Ca^{2+}]_i$ ) in this relaxation.

**Methods:** Canine trachea smooth muscle strips were loaded with the fluorescent probe fura-2 and mounted in a spectrophotometric system to measure force and intracellular calcium concentration ( $[Ca^{2+}]_i$ ) simultaneously. Calcium influx was estimated using a manganese quenching technique. Cyclic nucleotides in the airway smooth muscle strips were measured by radioimmunoassay.

**Results:** In smooth muscle strips stimulated with submaximal (0.1  $\mu M$ ) and maximal (10  $\mu M$ ) concentrations of acetylcholine, ketamine caused a concentration-dependent decrease in force and  $[Ca^{2+}]_i$ . The sensitivity of the force response to ketamine significantly decreased as the intensity of muscarinic receptor stimulation increased; the median effective concentration for relaxation induced by ketamine was 59  $\mu M$  and 850  $\mu M$  for tissue contracted by 0.1  $\mu M$  or 10  $\mu M$  acetylcholine, respectively ( $P < 0.05$ ). In contrast, the sensitivity of the  $[Ca^{2+}]_i$  response did not depend on the intensity of muscarinic receptor stimulation. Ketamine at 1 mM significantly inhibited calcium influx. Ketamine did not significantly increase cyclic nucleotide concentrations.

**Conclusions:** Ketamine-induced relaxation of canine airway smooth muscle is associated with a decrease in  $[Ca^{2+}]_i$  and calcium influx, effects that are not mediated by an increase in cyclic nucleotides; and the sensitivity of the force response to ketamine decreases as the level of preexisting muscle tone increases, an effect that is not explained by differential effects on  $[Ca^{2+}]_i$ . (Key words: Measurement techniques: Calcium con-

centration—fluorescent probe fura-2; cyclic nucleotides; manganese quenching. Anesthetic drug: ketamine. Lung, bronchus: bronchoconstriction. Trachea: canine. Muscle, smooth: airway; trachea.)

KETAMINE is a potent bronchodilator<sup>1</sup> that relaxes airway smooth muscle in part by a direct effect on airway smooth muscle cells.<sup>2-5</sup> Several issues regarding the mechanism of this direct effect remain unclear.

The concentration of intracellular calcium ( $[Ca^{2+}]_i$ ) is an important determinant of tone in airway smooth muscle.<sup>6,7</sup> In rabbit femoral arteries, ketamine-induced relaxation is associated with a decrease in  $[Ca^{2+}]_i$ ,<sup>8</sup> a finding consistent with studies of various types of smooth muscle that show that ketamine inhibits the function of L-type calcium channels.<sup>9-11</sup> However, decreases in  $[Ca^{2+}]_i$  can also be caused by other actions on  $Ca^{2+}$  homeostasis, such as increased  $Ca^{2+}$  efflux or reduced  $Ca^{2+}$  release from intracellular stores.

Adenosine cyclic 3',5'-monophosphate (cAMP) and guanosine cyclic 3',5'-monophosphate (cGMP) are second messengers that can relax airway smooth muscle by decreasing  $[Ca^{2+}]_i$ .<sup>12,13</sup> The possible role of increases in cyclic nucleotides in causing decreases in  $[Ca^{2+}]_i$  during ketamine-induced relaxation has not been evaluated.

The level of airway smooth muscle tone is an important determinant of the efficacy of many bronchodilators. This behavior, called "functional antagonism," may be related to differing mechanisms producing force at different levels of tone. In addition to an increase in  $[Ca^{2+}]_i$ , agonist-induced contraction is mediated by membrane receptor-coupled mechanisms that increase the amount of force produced for a given  $[Ca^{2+}]_i$  (i.e., the  $Ca^{2+}$  sensitivity).<sup>14-19</sup> We previously reported that during submaximal muscarinic receptor stimulation, halothane relaxed airway smooth muscle by decreasing  $[Ca^{2+}]_i$ , but that during maximal muscarinic stimulation halothane relaxed airway smooth muscle by

\* Research Fellow, Department of Anesthesiology.

† Assistant Professor of Anesthesiology.

‡ Research Technician.

§ Research Associate.

|| Associate Professor of Anesthesiology.

Received from the Departments of Anesthesiology and Physiology and Biophysics, Mayo Clinic and Mayo Foundation, Rochester, Minnesota. Submitted for publication September 23, 1996. Accepted for publication January 17, 1997.

Address reprint requests to Dr. Warner: Department of Anesthesiology, Mayo Clinic, Rochester, Minnesota 55905. Address electronic mail to: warner.david@mayo.edu

## KETAMINE AND CALCIUM INFLUX

decreasing  $\text{Ca}^{2+}$  sensitivity.<sup>20</sup> It is not known if ketamine had similar properties.

Our overall aim was to explore the mechanisms by which ketamine affects  $\text{Ca}^{2+}$  homeostasis and force in canine tracheal smooth muscle. We tested the following three hypotheses: 1) ketamine decreases calcium influx and  $[\text{Ca}^{2+}]_i$  in airway smooth muscle when applied during sustained contraction; 2) ketamine reduces  $[\text{Ca}^{2+}]_i$  in part by increasing the intracellular concentration of cyclic nucleotides; and 3) the effect of ketamine on force and  $[\text{Ca}^{2+}]_i$  depends on the intensity of muscarinic stimulation.

## Materials and Methods

### Tissue Preparation

Mongrel dogs of either sex were anesthetized with an intravenous injection of pentobarbital (30 mg/kg) and then exsanguinated. A 5- to 10-cm portion of extrathoracic trachea was excised and immersed in chilled physiologic salt solution (PSS) composed of 110.5 mM NaCl, 25.7 mM  $\text{NaHCO}_3$ , 5.6 mM dextrose, 3.4 mM KCl, 2.4 mM  $\text{CaCl}_2$ , 1.2 mM  $\text{KH}_2\text{PO}_4$ , and 0.8 mM  $\text{MgSO}_4$ . Fat, connective tissue, and the epithelium were removed with tissue forceps and scissors. For technical reasons,  $[\text{Ca}^{2+}]_i$  and cyclic nucleotides were measured in separate sets of experiments.

For studies estimating  $[\text{Ca}^{2+}]_i$ , all muscle strips (width, 0.8–1.0 mm; length, 4–5 mm) were mounted in a 0.1-ml quartz cuvette and were superfused continuously at 2 ml/min with PSS (37° C) aerated with 96% oxygen and 4% carbon dioxide. One end of the strip was anchored with stainless steel microforceps to a stationary metal rod; the other end was attached with a stainless steel microforceps to a calibrated force transducer (model AE801; Aksjeselkapet Mikro Elektronik, Heidelberg, Germany). During a 2-h equilibration period, the strips were stretched after repeated isometric contractions (lasting 2–3 min) produced by 1  $\mu\text{M}$  acetylcholine until the optimal length for force development was obtained. Each strip was maintained at this optimal length for the rest of the experiment.

For studies measuring intracellular cyclic nucleotide concentrations, all muscle strips (width, 3–5 mm; length, 1.0–1.6 cm; wet weight, 30–98 mg) were suspended in 25-ml water-jacketed tissue baths filled with PSS (37° C) aerated with 96% oxygen and 4% carbon dioxide (producing a pH of about 7.4; oxygen pressure of about 550 mmHg, and carbon dioxide pressure of

approximately 36 mmHg in the PSS). All strips were incubated with 10  $\mu\text{M}$  indomethacin to prevent formation of prostanoids that could affect cyclic nucleotide measurements.<sup>7,21</sup> Previously we showed that indomethacin does not affect responses to acetylcholine or to bronchodilators.<sup>7</sup> One end of each strip was anchored to a metal hook at the bottom of the tissue bath; the other end was attached to a calibrated force transducer (model FT-03D; Grass Instruments, Quincy, MA). During a 2-h equilibration period, the strips were contracted isometrically for 30 s every 5 min by supra-maximal electrical field stimulation (model S88D; Grass Instruments). The strips were stretched after each stimulation until optimal length was achieved.<sup>13,22,23</sup>

### Fura-2 Loading

Muscle strips were incubated in PSS (22° C) containing 5  $\mu\text{M}$  of the acetoxymethyl ester of fura-2 (fura-2/AM) aerated with 96% oxygen and 4% carbon dioxide for 3 h.<sup>6,20</sup> The fura-2/AM was dissolved in dimethylsulfoxide and 0.02% cremophor. After fura-2 loading, the strips were washed with normal PSS (37° C) for 30 to 50 min to remove extracellular fura-2/AM and dimethylsulfoxide and to allow de-esterification of any remaining cytosolic fura-2/AM. All further maneuvers were performed at 37° C.

### Fura-2 Fluorescence Measurements

Fura-2 fluorescence intensity was measured using a photometric system (model ph2; Scientific Instruments, Heidelberg, Germany) that measures optical and mechanical parameters of isolated tissue simultaneously. This system was previously described in detail.<sup>24</sup> Light from a xenon high-pressure lamp was monochromatically filtered to restrict excitation light to 340-nm, 360-nm, and the 380-nm wavelengths. Excitation light at these three wavelengths was alternated every 2 ms and focused by a high-aperture objective onto the muscle strips. Surface fluorescence emitted from the strips was filtered at  $500 \pm 5$  nm and detected using a photomultiplier assembly. Illumination intensity of the excitation light passing through the cuvette was detected by an absorbance monitor. The photomultiplier signal was normalized by this absorbance to minimize the influence of fluctuations in the intensity of the excitation lights. The emission fluorescence intensities due to excitation at 340-nm ( $F_{340}$ ), 360-nm ( $F_{360}$ ), and 380-nm ( $F_{380}$ ) wavelengths were measured and stored on a personal computer. The ratio of intensities at 340 nm and 380 nm excitation ( $F_{340}/F_{380}$ ) was used as an index of

$[Ca^{2+}]_i$ .<sup>6</sup> Isometric force was measured simultaneously using a force transducer (model AE801; Aksjeselkapet Mikro Elektronik).

#### Measurement of Manganese Influx

The quenching of fura-2 fluorescence by  $Mn^{2+}$  has been used to estimate  $Ca^{2+}$  influx in smooth muscle and other cell types.<sup>25-28</sup>  $Mn^{2+}$  rapidly binds to fura-2 and quenches its fluorescence.  $Mn^{2+}$  can be admitted to the cell *via* voltage-operated calcium channels. The rate of calcium influx can be estimated by the rate of  $Mn^{2+}$  influx<sup>25-28</sup> under the following conditions. When  $Mn^{2+}$  is added to the extracellular fluid bathing muscle cells loaded with fura-2, fluorescence declines. The rate of decline in fura-2 fluorescence, as measured by  $F_{360}$  (the isobestic wavelength for fura-2), is an index of  $Mn^{2+}$ , and thus calcium influx.<sup>25-28</sup>

To measure  $Mn^{2+}$  influx, 0.5 mM  $MnCl_2$  was added to the perfusate solutions, and fluorescence signals were measured during the next 10 min. Each strip was lysed at the end of the experiment by adding water, and background fluorescence was measured. The  $F_{360}$  signal was normalized by considering the signal 1 min before the addition of  $Mn^{2+}$  to be 1.0 and the background fluorescence after lysis to be 0. The  $Mn^{2+}$  influx rate was calculated by measuring the slope of the normalized  $F_{360}$  signal between 15 and 45 s after the onset of quenching, a period when the signal was most linear.<sup>28</sup>

#### Cyclic Nucleotide Measurements

Muscle strips were weighed and homogenized in 4 ml cold (2°C) 95% ethanol using a ground-glass pestle and homogenizing tube. The precipitated pellet was separated from the soluble extract by centrifugation at 4,000g for 10 min. The soluble extract was evaporated to dryness at approximately 55°C under a stream of nitrogen and was then suspended in 0.3 ml 4 mM ethylenediamine tetraacetic acid (pH 7.5). [<sup>3</sup>H]cAMP (1.25  $\mu$ Ci) or [<sup>3</sup>H]cGMP (0.4  $\mu$ Ci) was added as a tracer for cAMP or cGMP recovery determinations, respectively. Commercially available radioimmunoassay kits were used to determine the concentrations of cAMP and cGMP in the soluble extract.<sup>29</sup> The protein content of the precipitated pellet was determined by the method described by Lowry *et al.*<sup>30</sup> using bovine serum albumin dissolved in 1 N NaOH as the standard. The intracellular concentrations of cAMP ( $[cAMP]_i$ ) and cGMP ( $[cGMP]_i$ ) were expressed as picomoles per milligram of protein.

#### Materials

Ketamine was purchased from Sigma Chemical Company (St. Louis, MO). Fura-2/AM was purchased from Molecular Probes, Inc. (Eugene, OR). All other drugs and chemicals were purchased from Sigma Chemical Company. Stock solutions of fura-2/AM were prepared in dimethylsulfoxide; all other solutions and drugs were prepared in distilled water.

#### Statistics

In all experiments using three different concentrations of ketamine and comparing the difference between submaximal and maximal muscarinic stimulation, the data were compared by nonlinear regression analysis as described by Meddings.<sup>31</sup> In this method, force (F) at any concentration of drug (C) was given by the equation:

$$F = F_m C / (EC_{50} + C)$$

where  $F_m$  represents the maximal (or minimal) isometric force or  $[Ca^{2+}]_i$  and  $EC_{50}$  represents the concentration that produces half-maximal (or minimal) isometric force or  $[Ca^{2+}]_i$  for that drug. Nonlinear regression analysis was used to fit values of  $F_m$  and  $EC_{50}$  to data for F and C for each condition studied. This method allows comparison of curves to determine whether they are significantly different and whether this overall difference can be attributed to differences in  $F_m$ ,  $EC_{50}$ , or both parameters.

Multiple comparisons were performed with one-way analysis of variance as appropriate. Single comparisons were made using paired or unpaired *t* tests. A probability value of 0.05 or less was considered significant. In all studies, *n* refers to the number of dogs studied. Values are reported as means  $\pm$  SD.

## Results

#### Effects of Ketamine on Force and Intracellular Calcium Concentration.

After contraction with acetylcholine for 10 min, the strips were superfused with increasing concentrations of ketamine, which produced concentration-dependent decreases in both force and  $[Ca^{2+}]_i$  (figs. 1 and 2). The sensitivity of the force response to ketamine significantly decreased as the intensity of muscarinic stimulation increased; the  $EC_{50}$  for relaxation induced by ketamine was 59  $\mu$ M and 850  $\mu$ M for stimulation with 0.1  $\mu$ M and 850  $\mu$ M for stimulation with 10  $\mu$ M acetylcholine,

## KETAMINE AND CALCIUM INFLUX

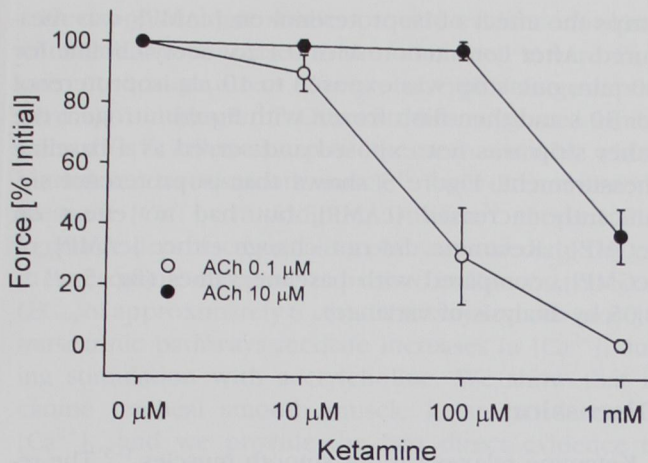

Fig. 1. Effect of ketamine (10  $\mu\text{M}$  to 1 mM) on canine smooth muscle strips contracted with two different concentrations of the physiologic agonist acetylcholine. In strips contracted with 0.1  $\mu\text{M}$  acetylcholine (open circles,  $n = 6$ ), ketamine caused a dose-dependent decrease in force. In strips contracted with 10  $\mu\text{M}$  acetylcholine (filled circles,  $n = 6$ ), relaxation occurred only in response to 1 mM ketamine. Values are means  $\pm$  standard deviations.

respectively ( $P < 0.05$ ). With maximal stimulation (10  $\mu\text{M}$  acetylcholine), relaxation occurred only with 1 mM ketamine. In contrast, the sensitivity of the response of  $F_{340}/F_{380}$  to ketamine did not depend on the intensity

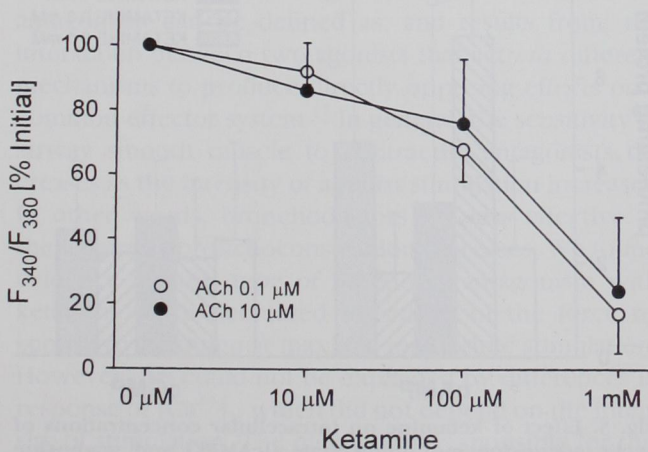

Fig. 2. Effect of ketamine (10  $\mu\text{M}$  to 1 mM) on the ratio of fluorescence intensities due to excitation at 340 and 380 nm ( $F_{340}/F_{380}$ , an index of intracellular calcium concentration). At submaximal (0.1  $\mu\text{M}$  acetylcholine; open circles;  $n = 6$ ) and maximal (10  $\mu\text{M}$  acetylcholine; filled circles;  $n = 6$ ) doses, ketamine caused a dose-dependent decrease in  $F_{340}/F_{380}$  and thus in the intracellular calcium concentration. There was no difference in response between the two different acetylcholine concentrations. Values are means  $\pm$  standard deviations.

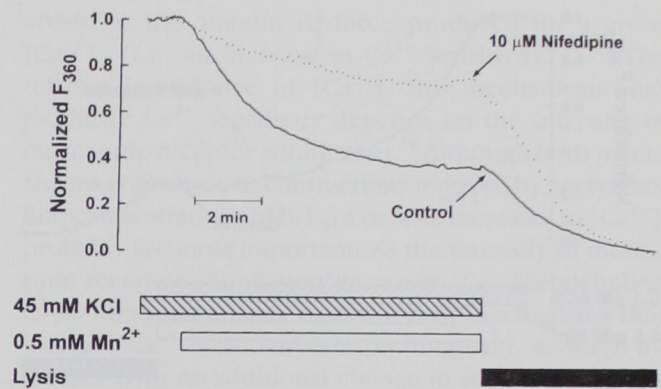

Fig. 3. Fluorescence intensity due to excitation at 360 nm ( $F_{360}$ ) in two strips of canine tracheal smooth muscle during stimulation with 45 mM KCl. The rate of decline of  $F_{360}$  produced by the addition of 0.5 mM  $\text{Mn}^{2+}$  was less in the strips exposed to nifedipine (10  $\mu\text{M}$ ).  $F_{360}$  was normalized to values before  $\text{Mn}^{2+}$  addition and after lysis.

of muscarinic stimulation (fig. 2); the  $\text{EC}_{50}$  for the response was 0.20 mM and 0.32 mM for stimulation with 0.1  $\mu\text{M}$  and 10  $\mu\text{M}$  acetylcholine, respectively. When ketamine was washed from the tissues, isometric force and  $F_{340}/F_{380}$  fully recovered (data not shown).

#### Characterization of Manganese Influx Technique

In strips contracted with 45 mM isotonic KCl, the sustained increases in force and  $[\text{Ca}^{2+}]_i$  are due to calcium influx through voltage-dependent calcium channels sensitive to dihydropyridines.<sup>32</sup> To validate the  $\text{Mn}^{2+}$  influx technique in canine tracheal smooth muscle, initial experiments were performed to look for the effect of nifedipine, a dihydropyridine-sensitive  $\text{Ca}^{2+}$  channel antagonist, on strips contracted with 45 mM isotonic KCl. Figure 3 shows the effect of nifedipine (10  $\mu\text{M}$ ) on  $\text{Mn}^{2+}$ -induced quenching of fura-2. In control strips, the addition of 0.5 mM  $\text{Mn}^{2+}$  10 min after contraction with KCl produced a rapid decrease in  $F_{360}$ , indicating that  $\text{Mn}^{2+}$  entered the cells and quenched fura-2. Ten minutes after the addition of  $\text{Mn}^{2+}$ , the strips were lysed with water, producing a further decrease in  $F_{360}$  to the level of background fluorescence. The addition of 10  $\mu\text{M}$  nifedipine 5 min after contraction (5 min before  $\text{Mn}^{2+}$ -induced quenching) decreased the rate of decline of  $F_{360}$  compared with control ( $0.051 \pm 0.017 \text{ min}^{-1}$  and  $0.075 \pm 0.018 \text{ min}^{-1}$ ;  $P < 0.05$  by paired  $t$  test;  $n = 5$ ), indicating that nifedipine decreased the rate of  $\text{Mn}^{2+}$  influx (and thus calcium influx) during KCl-mediated contractions (fig. 3). We conclude from these experiments that changes in  $\text{Mn}^{2+}$  influx as mea-

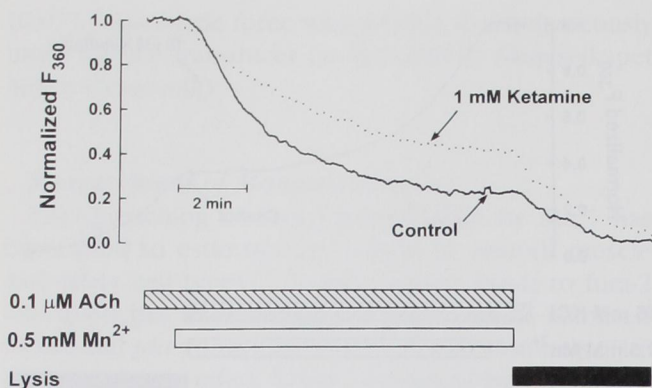

Fig. 4. Fluorescence intensity due to excitation at 360 nm ( $F_{360}$ ) in two strips of canine tracheal smooth muscle during stimulation with  $0.1 \mu\text{M}$  acetylcholine. The rate of decline of  $F_{360}$  produced by the addition of  $0.5 \text{ mM}$   $\text{Mn}^{2+}$  was less in the strip exposed to ketamine ( $1 \text{ mM}$ ).  $F_{360}$  was normalized to values before  $\text{Mn}^{2+}$  addition and after lysis.

sured by this technique can be used as an index of changes in calcium influx in this tissue.

#### Effects of Ketamine on Manganese Influx

Ketamine ( $1 \text{ mM}$ ) was added to the strips 10 min after contraction with  $0.1 \mu\text{M}$  acetylcholine. For each experiment, another strip from the same dog did not receive ketamine and served as a control.

Figure 4 shows the results of  $\text{Mn}^{2+}$ -induced quenching of fura-2 performed 20 min after contraction with  $0.1 \mu\text{M}$  acetylcholine. In control strips, the addition of  $0.5 \text{ mM}$   $\text{Mn}^{2+}$  produced a rapid decrease in  $F_{360}$ , indicating that  $\text{Mn}^{2+}$  entered the cell and quenched fura-2. Ten minutes after the addition of  $\text{Mn}^{2+}$ , the strips were lysed with water, producing a further decrease in  $F_{360}$  to the level of background fluorescence. The addition of  $1 \text{ mM}$  ketamine 10 min after contraction (10 min before  $\text{Mn}^{2+}$ -induced quenching), decreased the rate of decline of  $F_{360}$  compared with control ( $0.08 \pm 0.02 \text{ min}^{-1}$  and  $0.17 \pm 0.03 \text{ min}^{-1}$ ;  $P < 0.03$ , unpaired  $t$  test;  $n = 6$ ), indicating that ketamine inhibited the rate of  $\text{Mn}^{2+}$  influx (and thus calcium influx) during acetylcholine-mediated contractions (fig. 4).

#### Effect of Ketamine on Cyclic Nucleotides

A set of four strips were contracted with  $0.1 \mu\text{M}$  acetylcholine for 10 min. The strips were exposed to 0 (baseline),  $0.1$ ,  $0.3$ , or  $1 \text{ mM}$  ketamine for 1 min (the time required to produce maximal relaxation) and flash frozen in liquid nitrogen. To provide a positive control for increases in  $[\text{cAMP}]_i$ , in an additional set of two muscle

strips the effect of isoproterenol on  $[\text{cAMP}]_i$  was measured. After contraction with  $0.1 \mu\text{M}$  acetylcholine for 10 min, one strip was exposed to  $10 \mu\text{M}$  isoproterenol for 30 s and then flash frozen with liquid nitrogen; the other strip was not exposed and served as a baseline measurement. Figure 5 shows that isoproterenol significantly increased  $[\text{cAMP}]_i$  but had no effect on  $[\text{cGMP}]_i$ . Ketamine did not change either  $[\text{cAMP}]_i$  or  $[\text{cGMP}]_i$ , compared with baseline values (fig. 5;  $P > 0.05$  by analysis of variance).

## Discussion

Ketamine relaxes various smooth muscles.<sup>1-5</sup> The relaxation has been associated with a decrease in  $[\text{Ca}^{2+}]_i$  in vascular smooth muscle.<sup>8</sup> This decrease in  $[\text{Ca}^{2+}]_i$  could result from decreased influx, increased sequestration of calcium from the cytosol, or decreased calcium release from intracellular stores.

Data from Kanmura *et al.*<sup>33</sup> obtained in a skinned rabbit artery preparation suggests that ketamine does not affect sarcoplasmic reticulum calcium stores.

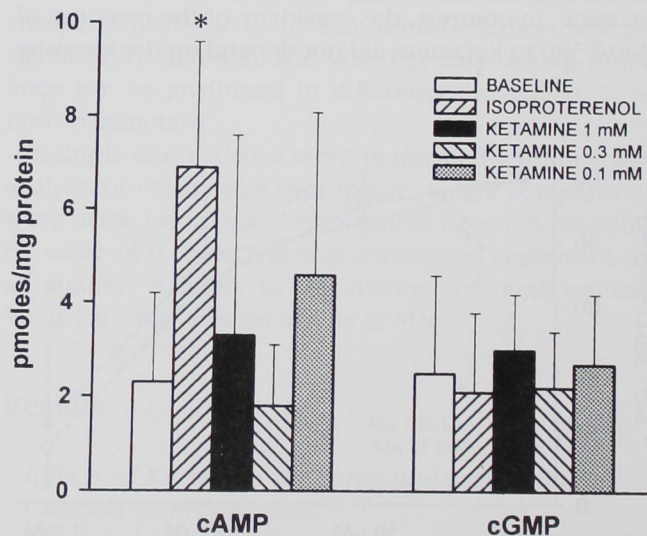

Fig. 5. Effect of ketamine on intracellular concentrations of cyclic adenosine monophosphate ( $[\text{cAMP}]_i$ ) and guanosine monophosphate ( $[\text{cGMP}]_i$ ). There was no effect of ketamine in canine smooth muscle strips ( $n = 7$ ) incubated with  $10 \mu\text{M}$  indomethacin and contracted with  $0.1 \mu\text{M}$  acetylcholine on  $[\text{cAMP}]_i$  and  $[\text{cGMP}]_i$ . In canine smooth muscle strips ( $n = 6$ ) incubated with  $10 \mu\text{M}$  indomethacin and contracted with  $0.1 \mu\text{M}$  acetylcholine,  $10 \mu\text{M}$  isoproterenol caused a significant increase in  $[\text{cAMP}]_i$  and served as a positive control. \*Significant difference from baseline ( $t$  test,  $n = 6$ ). Values are means  $\pm$  standard deviations.

## KETAMINE AND CALCIUM INFLUX

Electrophysiologic studies provide evidence for ketamine-induced decreases in the whole-cell inward  $\text{Ca}^{2+}$  current through direct effects on L-type voltage-dependent  $\text{Ca}^{2+}$  channels.<sup>9,11</sup> Other studies suggested inhibition of  $\text{Ca}^{2+}$  influx as a possible mechanism by which ketamine relaxes smooth muscle<sup>10,34</sup> but did not directly measure  $[\text{Ca}^{2+}]_i$ . In addition, Durieux<sup>35</sup> showed that ketamine depressed signaling pathways mediated by rat m1 muscarinic receptors expressed in *Xenopus* oocytes ( $\text{EC}_{50}$  of approximately  $6 \mu\text{M}$ ). In airway smooth muscle, muscarinic pathways mediate increases in  $[\text{Ca}^{2+}]_i$  during stimulation with acetylcholine. We show that in canine tracheal smooth muscle ketamine decreases  $[\text{Ca}^{2+}]_i$ , and we provide the first direct evidence in smooth muscle cells with intact cytosol that this is associated with a decrease in calcium influx.

Decreases in  $[\text{Ca}^{2+}]_i$  and calcium influx could be caused by increases in cyclic nucleotides (cAMP and cGMP), which play an important role as second messengers in airway smooth muscle relaxation. They may relax smooth muscle by reducing  $[\text{Ca}^{2+}]_i$ , by directly interfering with the function of contractile proteins, or by both mechanisms.<sup>12,36</sup> However we found no evidence that ketamine works by increasing either  $[\text{cAMP}]_i$  or  $[\text{cGMP}]_i$ .

A key issue when considering the net result of the effects of various excitatory and inhibitory inputs on the contractile state in airways is the phenomenon of "functional" or "physiologic" antagonism. Functional antagonism can be defined as, and results from, the interaction between two agonists that act *via* different mechanisms to produce directly opposing effects on a common effector system.<sup>37</sup> In general, the sensitivity of airway smooth muscle to contractile antagonists decreases as the intensity of agonist stimulation increases. In other words, bronchodilators are less effective as the degree of bronchoconstriction increases. We found evidence for this type of functional antagonism with ketamine, with decreased sensitivity of the force response to ketamine at maximal muscarinic stimulation. However this could not be explained by differences in response of  $[\text{Ca}^{2+}]_i$ , which did not depend on the intensity of stimulation. The mechanism responsible for this observation may be related to how mechanisms of contraction differ with the intensity of stimulation.

In smooth muscle, agonist-induced contraction is mediated by an increase in  $[\text{Ca}^{2+}]_i$ , which produces an increase in myosin light chain kinase activity and phosphorylation of the 20-kd regulatory myosin light chain.<sup>38</sup> Agonist-induced contraction may also produce an in-

crease in the amount of force produced for a given  $[\text{Ca}^{2+}]_i$ , (*i.e.*, an increase in  $\text{Ca}^{2+}$  sensitivity).<sup>14-19</sup> The relative importance of  $[\text{Ca}^{2+}]_i$  and mechanisms that modulate  $\text{Ca}^{2+}$  sensitivity depends on the intensity of muscarinic receptor stimulation.<sup>39</sup> Although both mechanisms contribute to contractions induced by acetylcholine concentrations of  $0.1 \mu\text{M}$  or less, increases in  $[\text{Ca}^{2+}]_i$  probably are most important. As the intensity of muscarinic receptor stimulation increases (*i.e.*, acetylcholine concentrations greater than  $0.1 \mu\text{M}$ ), mechanisms that increase  $\text{Ca}^{2+}$  sensitivity are predominant, as force increases with no additional change in steady-state levels of  $\text{Ca}^{2+}$ .<sup>39</sup> We found this in an additional six strips. The strips were contracted for 10 min with  $0.1 \mu\text{M}$  acetylcholine or  $10 \mu\text{M}$  acetylcholine sequentially applied (in random order), with applications separated by a 20-min washout and recovery period. Acetylcholine (at  $10 \mu\text{M}$ ) produced significantly more force than did  $0.1 \mu\text{M}$  acetylcholine ( $4.3 \pm 3.0$  times greater;  $P < 0.03$ ). In contrast,  $10 \mu\text{M}$  acetylcholine did not produce a significantly greater increase in  $F_{340}/F_{380}$  than  $0.1 \mu\text{M}$  acetylcholine ( $1.2 \pm 0.4$  times greater;  $P = 0.27$ ). Thus the increase in force induced by maximal muscarinic receptor stimulation (compared with  $0.1 \mu\text{M}$  acetylcholine) appears to be caused largely by increases in  $\text{Ca}^{2+}$  sensitivity, with no additional increase in  $[\text{Ca}^{2+}]_i$ .

The decreases in  $[\text{Ca}^{2+}]_i$  produced by  $100 \mu\text{M}$  ketamine during maximal stimulation (fig. 2) appear to be insufficient to affect force. This occurred probably because increased  $\text{Ca}^{2+}$  sensitivity is the predominant mechanism producing force during maximal stimulation, so that small changes in  $[\text{Ca}^{2+}]_i$  have little effect on force under these conditions. The larger decrease in  $[\text{Ca}^{2+}]_i$  produced by  $1 \text{ mM}$  ketamine may have been sufficient to reduce force. These results also suggest that ketamine, at least at concentrations less than or equal to  $100 \mu\text{M}$ , does not affect  $\text{Ca}^{2+}$  sensitivity. It is not possible from these experiments to determine if  $1 \text{ mM}$  ketamine might affect  $\text{Ca}^{2+}$  sensitivity. The fact that ketamine in concentrations as much as  $100 \mu\text{M}$  did not appear to affect  $\text{Ca}^{2+}$  sensitivity during maximal stimulation suggests that ketamine does not inhibit muscarinic signaling pathways during maximal muscarinic stimulation.<sup>35</sup>

It is interesting to contrast these results with those obtained with halothane, another anesthetic with bronchodilating properties.<sup>20</sup> In contrast to ketamine, halothane decreases  $[\text{Ca}^{2+}]_i$  and  $\text{Ca}^{2+}$  influx during submaximal, but not maximal, muscarinic stimulation.<sup>20</sup> In addition, the sensitivity of the force response to halothane

does not depend on the level of muscarinic stimulation, so that halothane decreases force while  $[Ca^{2+}]_i$  is constant. Thus halothane, unlike ketamine, decreases  $Ca^{2+}$  sensitivity.

Results from these *in vitro* measurements should be applied to live animals or humans only with caution. Although comparison between *in vitro* and *in vivo* drug concentrations across species may have limited value, peak plasma concentrations in humans have been reported to be approximately 60  $\mu M$  for an intravenous dose of 2 mg/kg ketamine,<sup>40</sup> indicating that the range of ketamine concentrations studied may be clinically relevant. Comparisons are facilitated by modest protein binding of ketamine *in vivo*.<sup>41</sup> To the extent that the direct effects of anesthetics are significant *in vivo*, our results suggest that ketamine may have a modest direct effect during submaximal bronchoconstriction but little direct effect on airway smooth muscle during severe bronchoconstriction. In contrast, halothane produces direct relaxation of maximally constricted canine airway smooth muscle.<sup>42</sup>

Ketamine-induced relaxation of canine airway smooth muscle is associated with a decrease in  $[Ca^{2+}]_i$  and calcium influx not mediated by cyclic nucleotides. The sensitivity of the force response to ketamine decreases as the level of preexisting airway smooth muscle tone increases, an effect that is not explained by differential effects on  $[Ca^{2+}]_i$ .

## References

- Huber FC Jr, Reves JG, Gutierrez J, Corssen G: Ketamine: its effect on airway resistance in man. *South Med J* 1972; 65:1176-80
- Lundy PM, Gowdey CW, Colhoun EH: Tracheal smooth muscle relaxant effect of ketamine. *Br J Anaesth* 1974; 46:333-6
- Hirshman CA, Downes H, Farbood A, Bergman NA: Ketamine block of bronchospasm in experimental canine asthma. *Br J Anaesth* 1979; 51:713-18
- Gateau O, Bourgain J-L, Gaudy J-H, Benveniste J: Effects of ketamine on isolated human bronchial preparations. *Br J Anaesth* 1989; 63:692-5
- Wilson LE, Hatch DJ, Rehder K: Mechanisms of the relaxant action of ketamine on isolated porcine tracheal muscle. *Br J Anaesth* 1993; 71:544-50
- Ozaki H, Kwon S-C, Tajimi M, Karaki H: Changes in cytosolic  $Ca^{2+}$  and contraction induced by various stimulants and relaxants in canine tracheal smooth muscle. *Pflügers Arch* 1990; 416:351-9
- Jones KA, Lorenz RR, Morimoto N, Sieck GC, Warner DO: Halothane reduces force and intracellular  $Ca^{2+}$  in airway smooth muscle independently of cyclic nucleotides. *Am J Physiol* 1995; 268:L166-72
- Ratz PH, Callahan PE, Lattanzio FA Jr: Ketamine relaxes rabbit femoral arteries by reducing  $[Ca^{2+}]_i$  and phospholipase C activity. *Eur J Pharmacol* 1993; 236:433-41
- Yamazaki M, Ito Y, Kuze S, Shibuya N, Momose Y: Effects of ketamine on voltage-dependent  $Ca^{2+}$  currents in single smooth muscle cells from rabbit portal vein. *Pharmacology* 1992; 45:162-9
- Hirota K, Zsigmond EK, Matsuki A, Rabito SF: Ketamine inhibits contractile responses of intestinal smooth muscle by decreasing the influx of calcium through the L-type calcium channel. *Acta Anaesthesiol Scand* 1995; 39:759-64
- Yamakage M, Hirshman CA, Croxton TL: Inhibitory effects of thiopental, ketamine, and propofol on voltage-dependent  $Ca^{2+}$  channels in porcine tracheal smooth muscle cells. *ANESTHESIOLOGY* 1995; 83:1274-82
- Gunst SJ, Bandyopadhyay S: Contractile force and intracellular  $Ca^{2+}$  during relaxation of canine tracheal smooth muscle. *Am J Physiol* 1989; 257:C355-64
- Jones KA, Lorenz RR, Warner DO, Katusic ZS, Sieck GC: Changes in cytosolic cGMP and calcium in airway smooth muscle relaxed by 3-morpho-lynosydnonimine. *Am J Physiol* 1994; 266:L9-16
- Nishimura J, Moreland S, Ahn HY, Kawase T, Moreland RS, van Breemen C: Endothelin increases myofilament  $Ca^{2+}$  sensitivity in  $\alpha$ -toxin-permeabilized rabbit mesenteric artery. *Circ Res* 1992; 71:951-9
- Fujiwara T, Itoh T, Kubota Y, Kuriyama H: Effects of guanosine nucleotides on skinned smooth muscle tissue of the rabbit mesenteric artery. *J Physiol (London)* 1989; 408:535-47
- Kitazawa T, Gaylann BD, Denney GH, Somlyo AP: G-protein-mediated  $Ca^{2+}$  sensitization of smooth muscle contraction through myosin light chain phosphorylation. *J Biol Chem* 1991; 266:1708-15
- Kitazawa T, Masuo M, Somlyo AP: G-protein-mediated inhibition of myosin light chain phosphatase in vascular smooth muscle. *Proc Natl Acad Sci USA* 1991; 88:9307-10
- Kitazawa T, Somlyo AP: Desensitization and muscarinic resensitization of force and myosin light chain phosphorylation to cytoplasmic  $Ca^{2+}$  in smooth muscle. *Biochem Biophys Res Comm* 1990; 172:1291-7
- Kubota Y, Nomura M, Kamm KE, Mumby MC, Stull JT: GTP $\gamma$ S-dependent regulation of smooth muscle contractile elements. *Am J Physiol* 1992; 262:C405-10
- Jones KA, Wong GY, Lorenz RR, Warner DO, Sieck GC: Effects of halothane on the relationship between cytosolic calcium and force in airway smooth muscle. *Am J Physiol* 1994; 266:L199-204
- Zhou H-L, Torphy TJ: Relationship between cyclic guanosine monophosphate accumulation and relaxation of canine trachealis induced nitrovaso-dilators. *J Pharmacol Exp Therap* 1991; 258:972-8
- Brichant J-F, Gunst SJ, Warner DO, Rehder K: Halothane, enflurane, and isoflurane depress the peripheral vagal motor pathway in isolated canine tracheal smooth muscle. *ANESTHESIOLOGY* 1991; 74:325-32
- Jones KA, Housmans PR, Warner DO, Lorenz RR, Rehder K: Halothane alters cytosolic calcium transient in tracheal smooth muscle. *Am J Physiol* 1993; 265:L80-6
- Güth K, Wojciechowski R: Perfusion cuvette for the simultaneous measurement of mechanical, optical and energetic parameters of skinned muscle fibers. *Pflügers Arch* 1986; 407:552-7
- Chen Q, van Breemen C: The superficial buffer barrier in venous smooth muscle: sarcoplasmic reticulum refilling and unloading. *Br J Pharmacol* 1993; 109:336-43
- Chen X-L, Rembold CM: Cyclic nucleotide-dependent regula-

## KETAMINE AND CALCIUM INFLUX

- tion of  $Mn^{2+}$  influx,  $[Ca^{2+}]_i$ , and arterial smooth muscle relaxation. *Am J Physiol* 1992; 263:C468-73
27. Jacob R: Agonist-stimulated divalent cation entry into single cultured human umbilical vein endothelial cells. *J Physiol (London)* 1990; 421:55-77
  28. Mertz LM, Baum BJ, Ambudkar IS: Refill status of the agonist-sensitive  $Ca^{2+}$  pool regulates  $Mn^{2+}$  influx into parotid acini. *J Biol Chem* 1990; 265:15010-14
  29. Brooker G, Harper JF, Terasaki WL, Moylan RD: Radioimmunoassay of cyclic AMP and cyclic GMP. *Advances in Cyclic Nucleotide Research* 1979; 10:1-33
  30. Lowry OH, Roseburgh NJ, Farr AL, Randall RJ: Protein measurement with folin phenol reagent. *J Biol Chem* 1951; 193:265-75
  31. Meddings JB, Scott RB, Fick GH: Analysis and comparison of sigmoidal curves: application to dose-response data. *Am J Physiol* 1989; 257:G982-9
  32. Worley JF III, Kotlikoff MI: Dihydropyridine-sensitive single calcium channels in airway smooth muscle cells. *Am J Physiol* 1990; 259:L468-80
  33. Kanmura Y, Yoshitake J, Casteels R: Ketamine-induced relaxation in intact and skinned smooth muscles of the rabbit ear artery. *Br J Pharmacol* 1989; 97:591-7
  34. Abdalla SS, Laravuso RB, Will JA: Mechanisms of the inhibitory effect of ketamine on guinea pig isolated main pulmonary artery. *Anesth Analg* 1994; 78:17-22
  35. Durieux ME: Inhibition by ketamine of muscarinic acetylcholine receptor function. *Anesth Analg* 1995; 81:57-62
  36. Pfitzer G, Hofmann F, DiSalvo J, Rüegg JC: cGMP and cAMP inhibit tension development in skinned coronary arteries. *Pflügers Arch* 1984; 401:277-80
  37. Torphy TJ, Hay DWP: Biomechanical regulation of airway smooth-muscle tone: an overview. *Airway Smooth Muscle: Modulation of Receptors and Response*. Edited by Agrawal DK, Townley RG. Boca Raton, FL, CRC Press, 1990, pp 39-68
  38. Silver PJ, Stull JT: Phosphorylation of myosin light chain and phosphorylase in tracheal smooth muscle in response to KCl and carbachol. *Mol Pharmacol* 1984; 25:267-74
  39. Shieh C-C, Petrini MF, Dwyer TM, Farley JM: Concentration-dependence of acetylcholine-induced changes in calcium and tension in swine trachealis. *J Pharmacol Exp Ther* 1991; 256:141-8
  40. Idvall J, Ahlgren I, Aronsen KF, Stenberg P: Ketamine infusions: pharmacokinetics and clinical effects. *Br J Anaesth* 1979; 51:1167-73
  41. Dayton PG, Stiller RL, Cook DR, Perel JM: The binding of ketamine to plasma proteins: Emphasis on human plasma. *Eur J Clin Pharmacol* 1983; 24:825-31
  42. Yamamoto K, Morimoto N, Warner DO, Rehder K, Jones KA: Factors influencing the direct actions of volatile anesthetics on airway smooth muscle. *ANESTHESIOLOGY* 1993; 78:1102-11
